# Supplementary material for: Quantitative investigation of C–H⋯π and other intermolecular interactions in a series of crystalline N-(substituted phenyl)-2-naphthamide derivatives
Source: Royal Society of Chemistry journal article supplement (doi:10.1039/c7ce01310h), 2017-01-01
Supplement: c7ce01310h1.pdf [file c7ce01310h1.pdf]

## Electronic Supporting Information

### Quantitative investigation of C-H... $\pi$ and other intermolecular interactions in a series of crystalline N-(substituted phenyl)-2-naphthamide derivatives.

Rahul Shukla<sup>a</sup>, Aamer Saeed<sup>\*b</sup>, Jim Simpson<sup>\*c</sup> and Deepak Chopra<sup>\*a</sup>

<sup>a</sup> Crystallography and Crystal Chemistry Laboratory, Department of Chemistry, IISER Bhopal, Bhopal 462066, Madhya Pradesh, India.

E-mail: [dchopra@iiserb.ac.in](mailto:dchopra@iiserb.ac.in); Tel: +91 0755 669 1311

<sup>b</sup> Department of Chemistry, Quaid-i-Azam University-45320, Islamabad, Pakistan

E-mail [aamersaeed@yahoo.com](mailto:aamersaeed@yahoo.com) Fax +9251 9064 2241; Tel +9251 9064 2128

<sup>c</sup> Department of Chemistry, University of Otago, P.O. Box 56, Dunedin 9054, New Zealand

E-mail: [jsimpson@alkali.otago.ac.nz](mailto:jsimpson@alkali.otago.ac.nz); Fax +643 479 7906; Tel: +643 479 7914

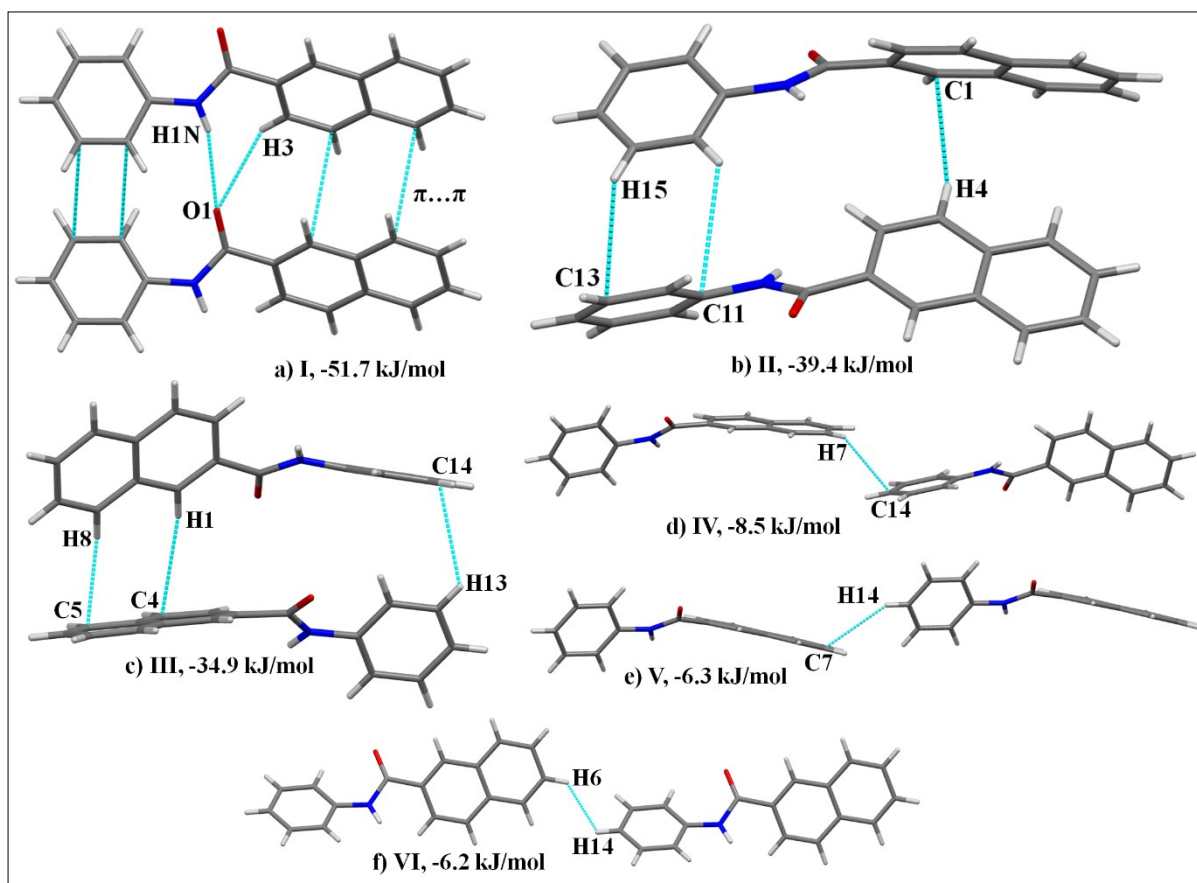

Figure S1: (a)-(f) Motifs I-VI present in the crystal packing of **1**.

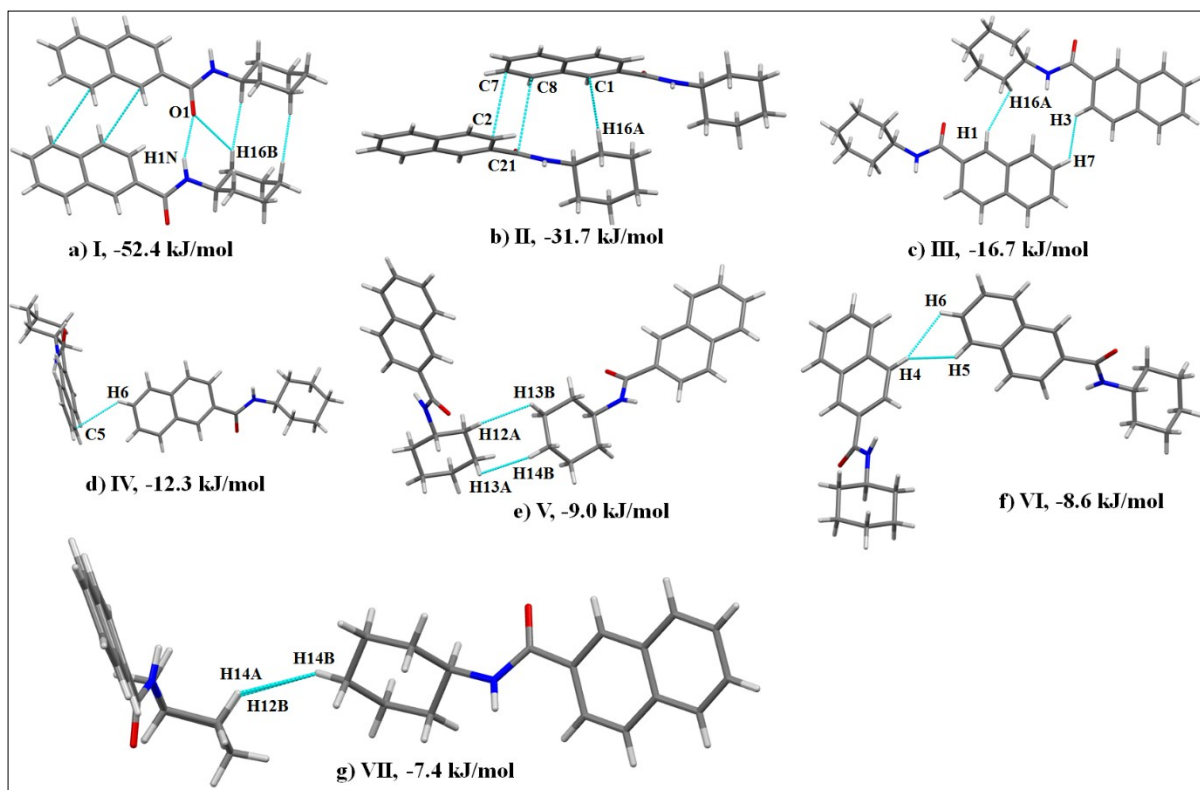

**Figure S2:** (a)-(g) Motifs I-VII present in the crystal packing of **2**.

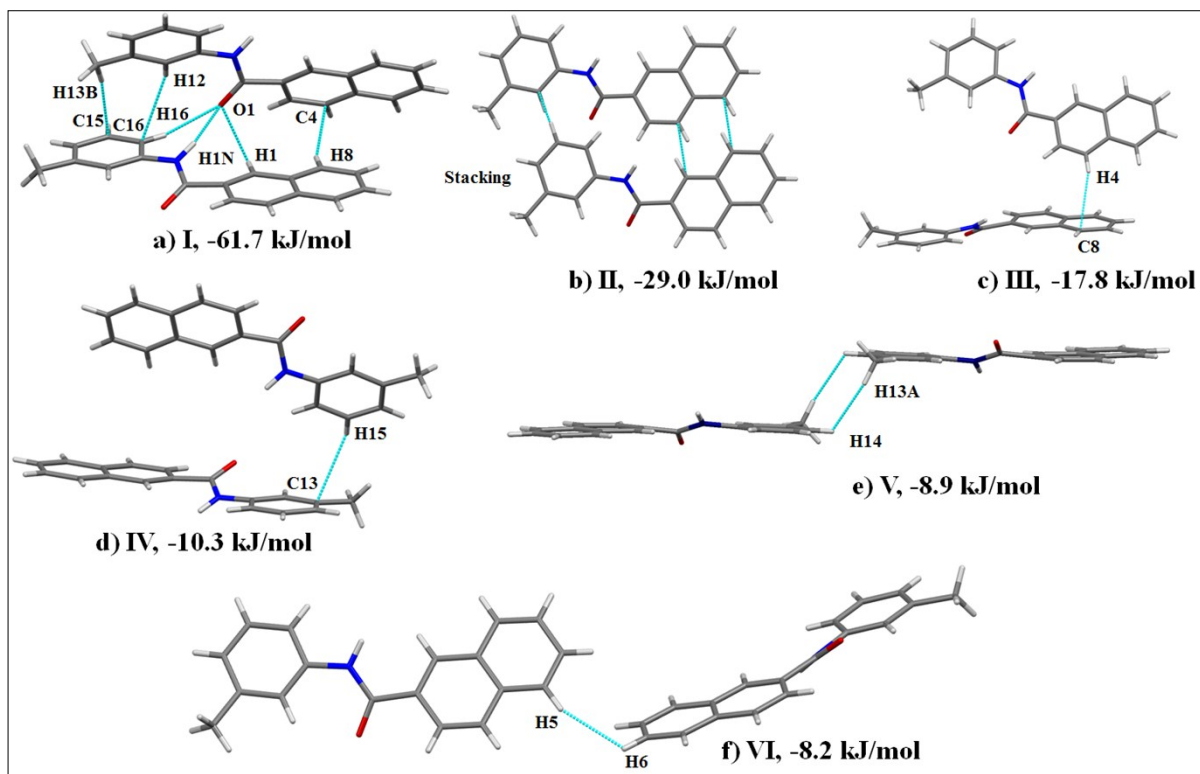

**Figure S3:** (a)-(f) Motifs I-VI present in the crystal packing of **3**.

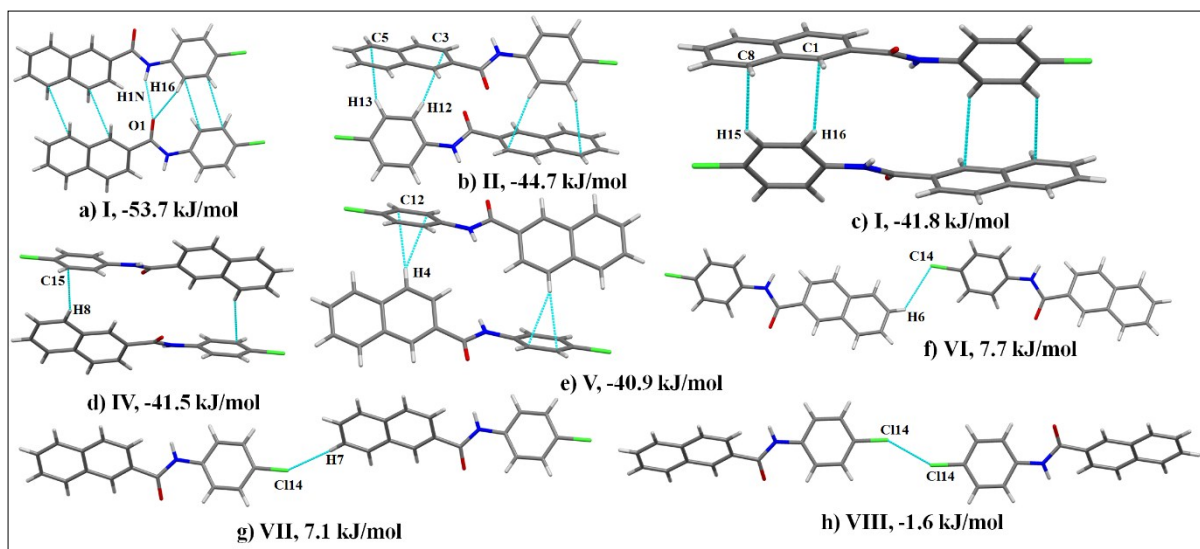

**Figure S4:** (a)-(f) Motifs I-VIII present in the crystal packing of **4**.

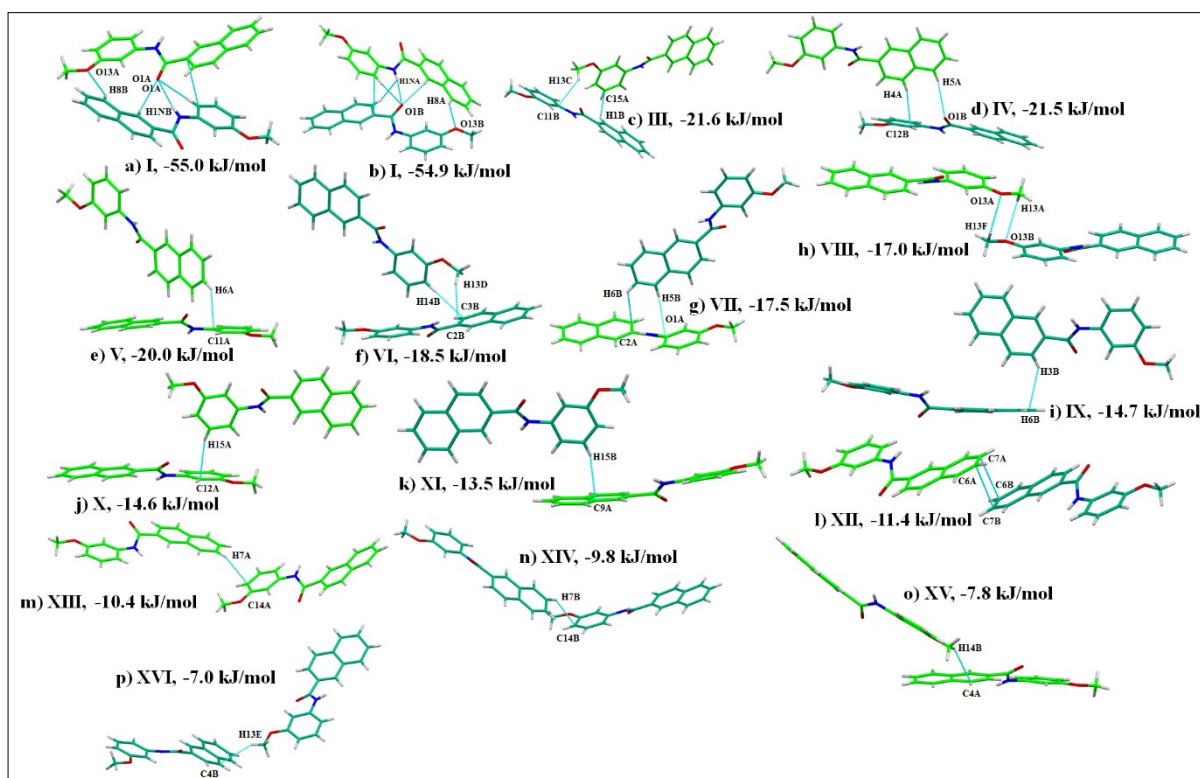

**Figure S5:** (a)-(p) Motifs I-XVI present in the crystal packing of **5**.

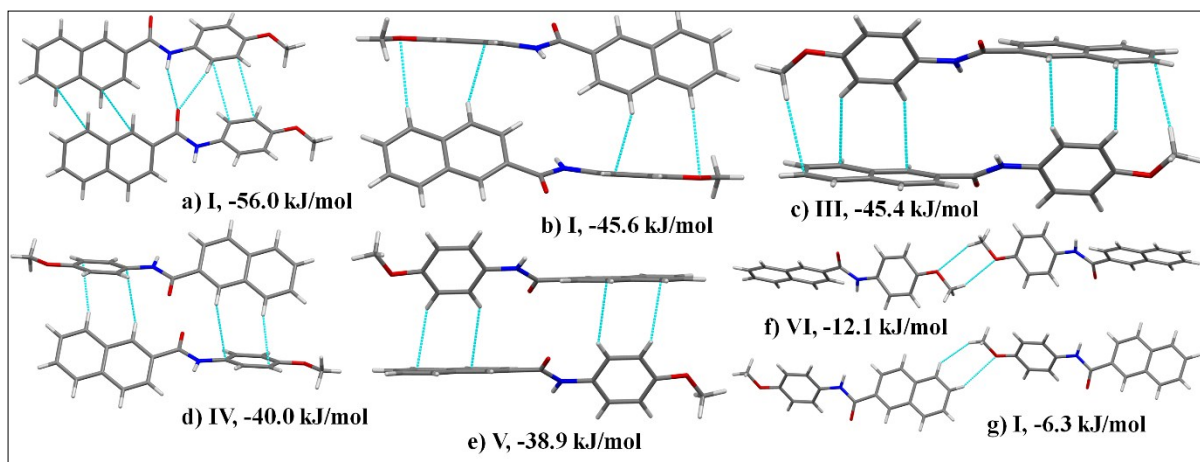

**Figure S6:** (a)-(g) Motifs I-VII present in the crystal packing of **6**

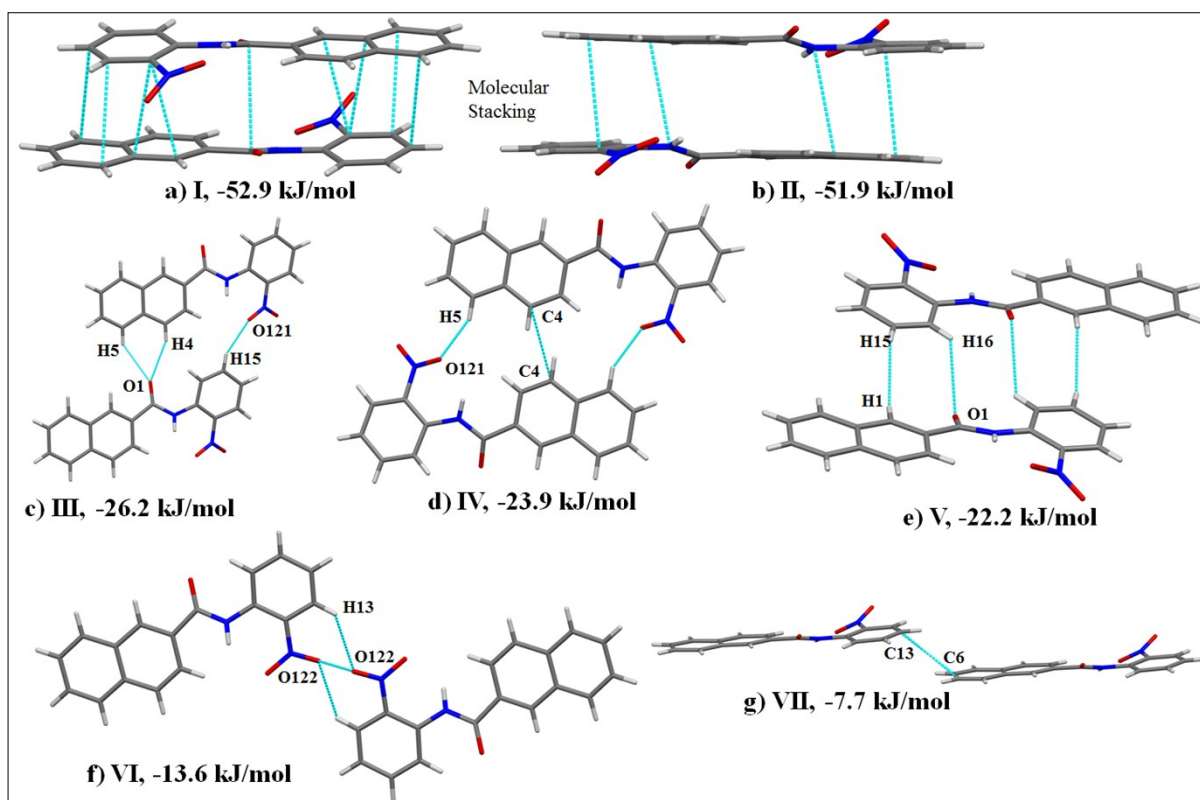

**Figure S7:** (a)-(g) Motifs I-VII present in the crystal packing of **7**.



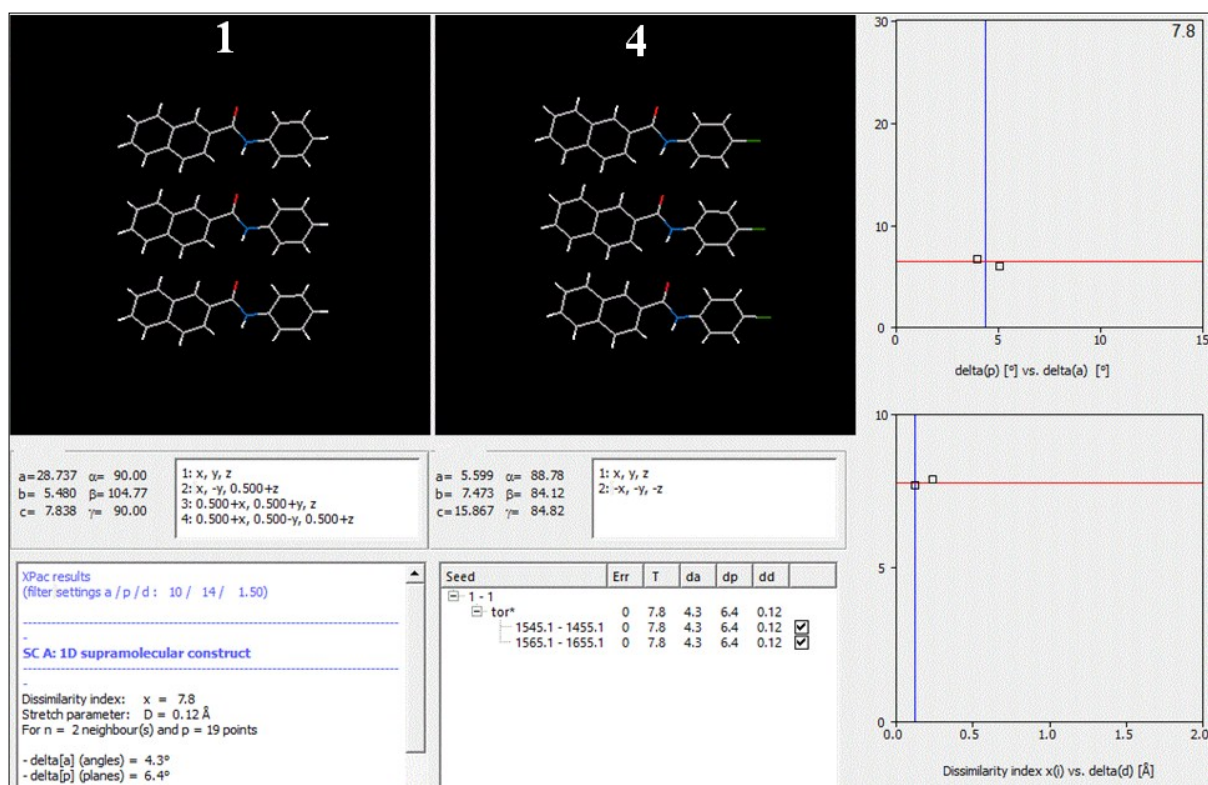

Figure S8: Isostructural comparison between 1 and 4.

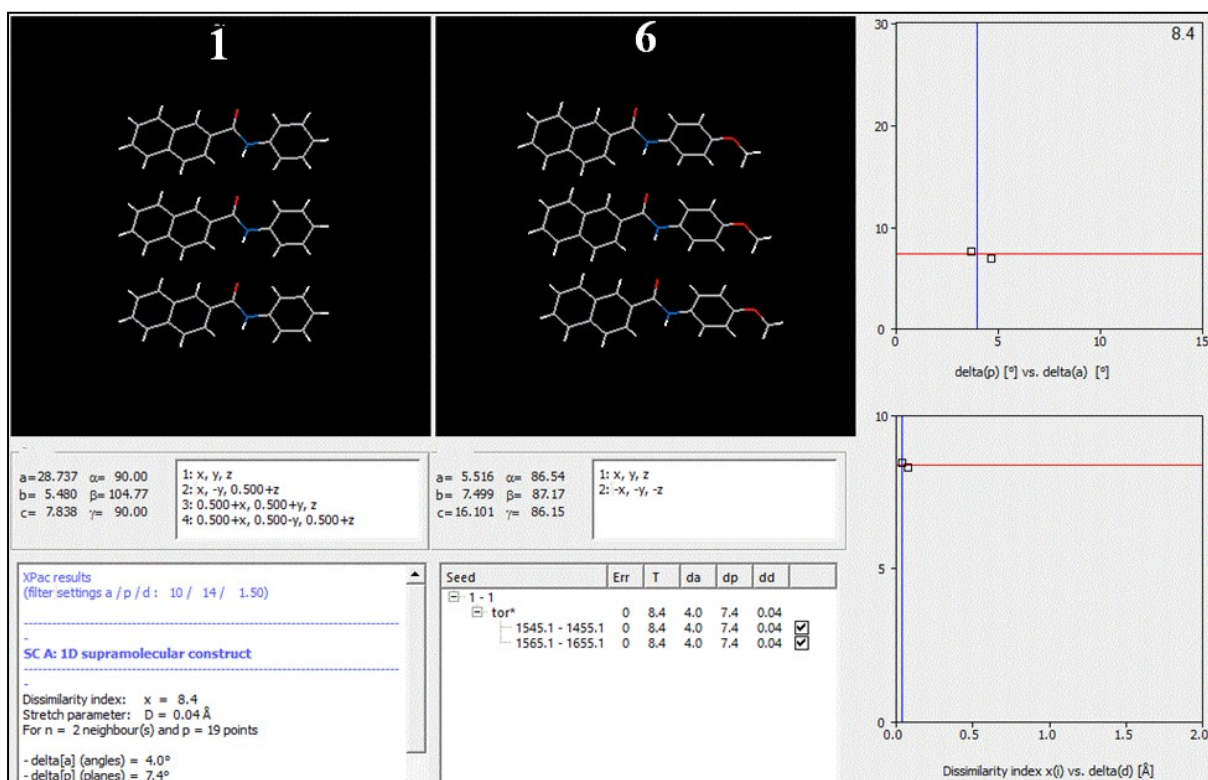

Figure S9: Figure S8: Isostructural comparison between 1 and 6.

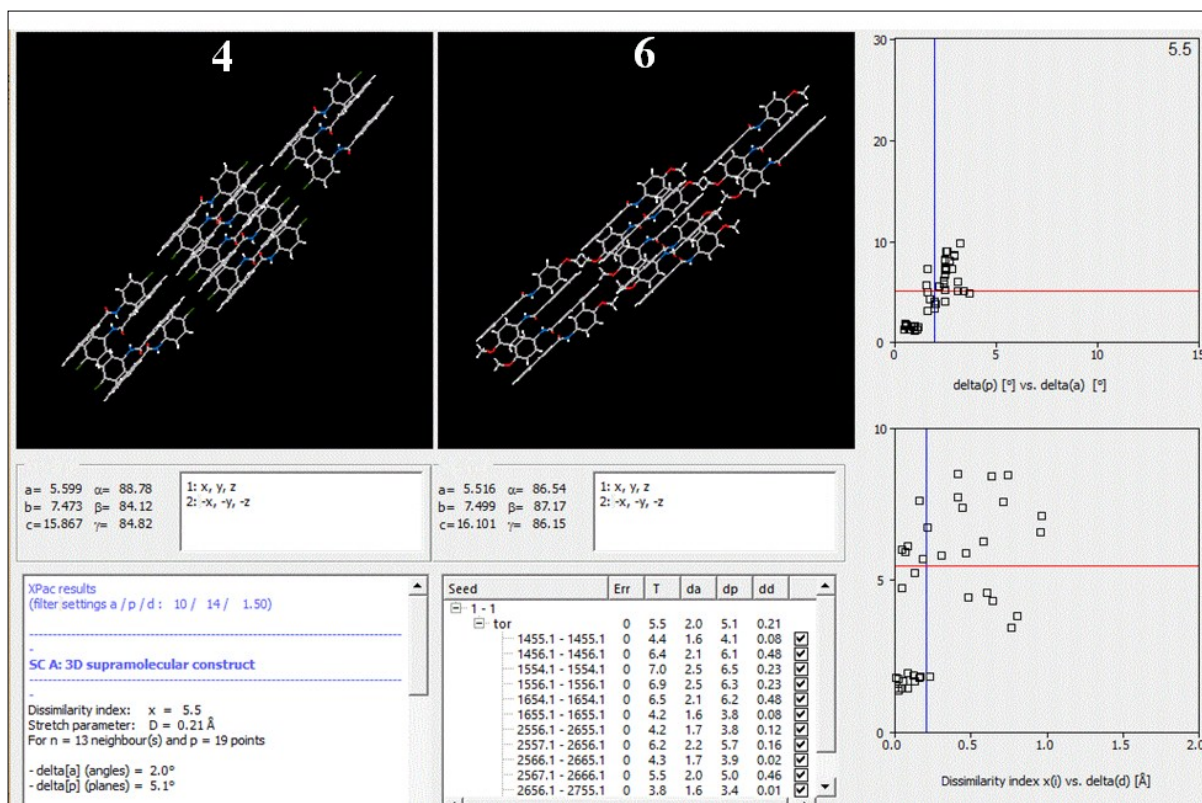

Figure S10: Figure S8: Isostructural comparison between 4 and 6.

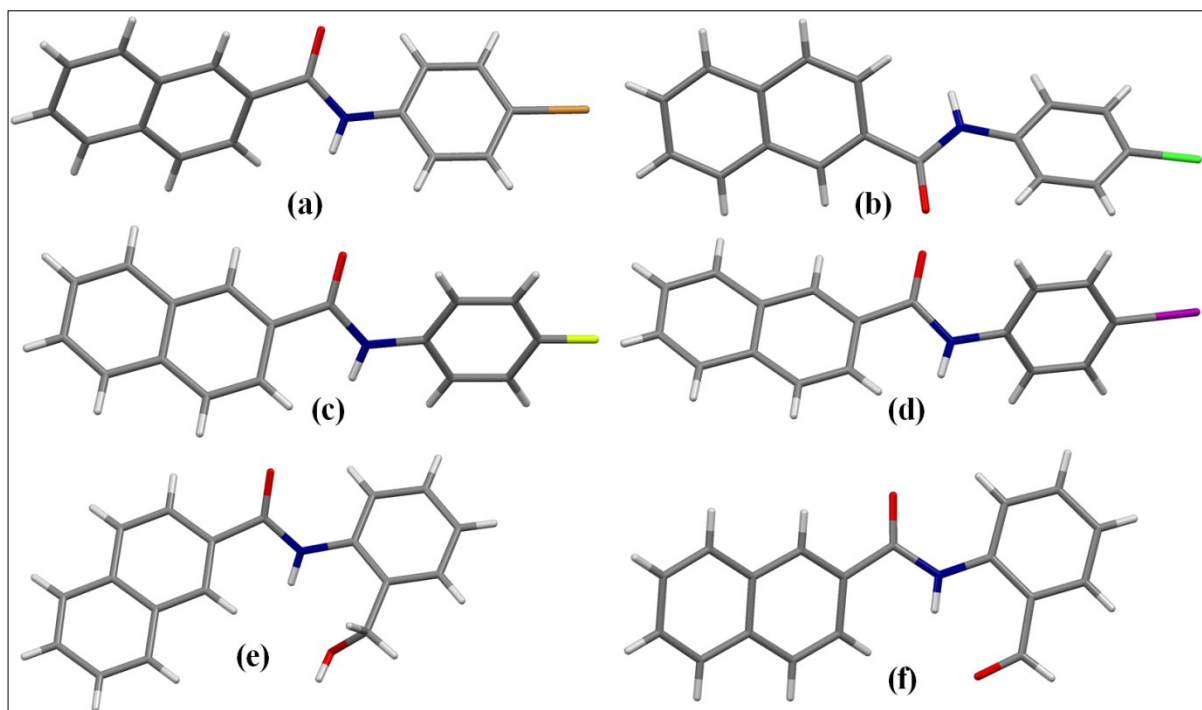

Figure S11: Structures of a) RIXGUC b) RIXHAJ c) RIXHEN d) RIXHIR e) XAFBOY and f) XAFCAL

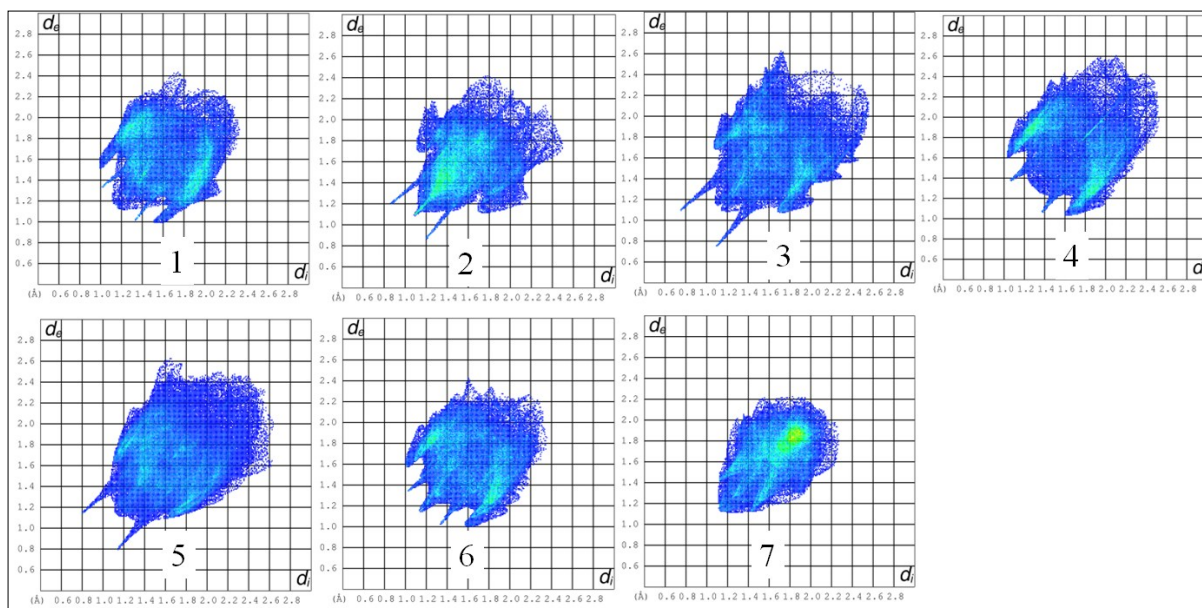

Figure S12: 2D Fingerprint plots for 1-7.
